# Supplementary material
Source: PubMed Central journal article supplement (PMC4543537)
Supplement: NIHMS701310-supplement-Supp_TableS1.pdf [file NIHMS701310-supplement-Supp_TableS1.pdf]

| <b>R2≥0</b>     | No LD Pruning |        |          |        |                   |        |          |        |        |  |
|-----------------|---------------|--------|----------|--------|-------------------|--------|----------|--------|--------|--|
|                 | RR            |        | AUC      |        | Calibration Score |        | N        | Dosage |        |  |
| Pvalue          | N             | Dosage | Genotype | Dosage | Genotype          | Dosage | Genotype | N      | Dosage |  |
| <b>≤5E-08</b>   | 166           | 1.18   | 1.18     | 0.777  | 0.777             | 2.691  | 2.684    | 36     | 1.20   |  |
| <b>≤0.00001</b> | 525           | 1.23   | 1.23     | 0.780  | 0.780             | 2.560  | 2.563    | 164    | 1.24   |  |
| <b>≤0.001</b>   | 7387          | 1.28   | 1.28     | 0.783  | 0.783             | 2.855  | 2.888    | 2267   | 1.27   |  |
| <b>≤0.01</b>    | 41017         | 1.21   | 1.21     | 0.780  | 0.780             | 2.368  | 2.369    | 13235  | 1.22   |  |
| <b>≤0.05</b>    | 156193        | 1.22   | 1.21     | 0.780  | 0.780             | 2.298  | 2.257    | 50137  | 1.21   |  |
| <b>≤0.1</b>     | 287398        | 1.20   | 1.20     | 0.779  | 0.779             | 2.413  | 2.367    | 92396  | 1.20   |  |
| <b>≤0.2</b>     | 535188        | 1.18   | 1.18     | 0.778  | 0.778             | 2.381  | 2.350    | 167261 | 1.20   |  |
| <b>≤0.5</b>     | 1244367       | 1.16   | 1.16     | 0.777  | 0.777             | 2.497  | 2.473    | 372861 | 1.20   |  |

| <b>R2≥0.3</b>   | No LD Pruning |        |          |        |                   |        |          |        |        |  |
|-----------------|---------------|--------|----------|--------|-------------------|--------|----------|--------|--------|--|
|                 | RR            |        | AUC      |        | Calibration Score |        | N        | Dosage |        |  |
| Pvalue          | N             | Dosage | Genotype | Dosage | Genotype          | Dosage | Genotype | N      | Dosage |  |
| <b>≤5E-08</b>   | 157           | 1.17   | 1.18     | 0.777  | 0.777             | 2.703  | 2.712    | 33     | 1.19   |  |
| <b>≤0.00001</b> | 497           | 1.22   | 1.22     | 0.779  | 0.780             | 2.568  | 2.600    | 147    | 1.20   |  |
| <b>≤0.001</b>   | 7205          | 1.27   | 1.27     | 0.783  | 0.783             | 2.880  | 2.915    | 2129   | 1.16   |  |
| <b>≤0.01</b>    | 39773         | 1.21   | 1.21     | 0.780  | 0.780             | 2.403  | 2.405    | 12294  | 1.16   |  |
| <b>≤0.05</b>    | 151000        | 1.21   | 1.21     | 0.780  | 0.780             | 2.288  | 2.266    | 46239  | 1.16   |  |
| <b>≤0.1</b>     | 277677        | 1.20   | 1.20     | 0.779  | 0.779             | 2.386  | 2.366    | 84121  | 1.17   |  |
| <b>≤0.2</b>     | 516510        | 1.18   | 1.18     | 0.778  | 0.778             | 2.357  | 2.344    | 153412 | 1.17   |  |
| <b>≤0.5</b>     | 1199808       | 1.16   | 1.15     | 0.777  | 0.777             | 2.470  | 2.473    | 340442 | 1.18   |  |

| <b>R2≥0.5</b>   | No LD Pruning |        |          |        |                   |        |          |        |        |  |
|-----------------|---------------|--------|----------|--------|-------------------|--------|----------|--------|--------|--|
|                 | RR            |        | AUC      |        | Calibration Score |        | N        | Dosage |        |  |
| Pvalue          | N             | Dosage | Genotype | Dosage | Genotype          | Dosage | Genotype | N      | Dosage |  |
| <b>≤5E-08</b>   | 157           | 1.17   | 1.18     | 0.777  | 0.777             | 2.703  | 2.712    | 33     | 1.19   |  |
| <b>≤0.00001</b> | 472           | 1.22   | 1.22     | 0.779  | 0.779             | 2.577  | 2.601    | 130    | 1.22   |  |
| <b>≤0.001</b>   | 6959          | 1.27   | 1.27     | 0.783  | 0.783             | 2.896  | 2.921    | 1961   | 1.21   |  |
| <b>≤0.01</b>    | 38016         | 1.21   | 1.21     | 0.779  | 0.780             | 2.400  | 2.391    | 11175  | 1.19   |  |
| <b>≤0.05</b>    | 144181        | 1.21   | 1.21     | 0.779  | 0.780             | 2.278  | 2.258    | 41855  | 1.18   |  |
| <b>≤0.1</b>     | 264651        | 1.20   | 1.20     | 0.779  | 0.779             | 2.375  | 2.363    | 75739  | 1.18   |  |
| <b>≤0.2</b>     | 491577        | 1.18   | 1.18     | 0.778  | 0.778             | 2.349  | 2.345    | 137553 | 1.17   |  |
| <b>≤0.5</b>     | 1140603       | 1.15   | 1.15     | 0.777  | 0.777             | 2.450  | 2.453    | 303550 | 1.16   |  |

| <b>R2≥0.8</b> | No LD Pruning |        |          |        |                   |        |          |        |        |  |
|---------------|---------------|--------|----------|--------|-------------------|--------|----------|--------|--------|--|
|               | RR            |        | AUC      |        | Calibration Score |        | N        | Dosage |        |  |
| Pvalue        | N             | Dosage | Genotype | Dosage | Genotype          | Dosage | Genotype | N      | Dosage |  |
| <b>≤5E-08</b> | 139           | 1.17   | 1.17     | 0.777  | 0.777             | 2.722  | 2.752    | 28     | 1.18   |  |

|                 |        |      |      |       |       |       |       |        |      |
|-----------------|--------|------|------|-------|-------|-------|-------|--------|------|
| <b>≤0.00001</b> | 411    | 1.22 | 1.22 | 0.779 | 0.779 | 2.591 | 2.616 | 107    | 1.25 |
| <b>≤0.001</b>   | 6015   | 1.26 | 1.26 | 0.782 | 0.782 | 2.907 | 2.921 | 1498   | 1.26 |
| <b>≤0.01</b>    | 32043  | 1.19 | 1.19 | 0.779 | 0.779 | 2.458 | 2.460 | 8145   | 1.20 |
| <b>≤0.05</b>    | 120167 | 1.20 | 1.20 | 0.779 | 0.779 | 2.272 | 2.279 | 29735  | 1.20 |
| <b>≤0.1</b>     | 220218 | 1.18 | 1.18 | 0.778 | 0.778 | 2.361 | 2.363 | 53392  | 1.18 |
| <b>≤0.2</b>     | 407985 | 1.17 | 1.17 | 0.778 | 0.778 | 2.322 | 2.314 | 96257  | 1.19 |
| <b>≤0.5</b>     | 944060 | 1.15 | 1.15 | 0.777 | 0.777 | 2.415 | 2.408 | 209758 | 1.19 |

| <b>R2≥0.9</b>   | No LD Pruning |        |          |        |                   |        |          |        |        |
|-----------------|---------------|--------|----------|--------|-------------------|--------|----------|--------|--------|
|                 | RR            |        | AUC      |        | Calibration Score |        | N        | Dosage |        |
| Pvalue          | N             | Dosage | Genotype | Dosage | Genotype          | Dosage | Genotype | N      | Dosage |
| <b>≤5E-08</b>   | 120           | 1.17   | 1.17     | 0.777  | 0.777             | 2.729  | 2.735    | 23     | 1.17   |
| <b>≤0.00001</b> | 335           | 1.21   | 1.21     | 0.779  | 0.779             | 2.608  | 2.632    | 86     | 1.25   |
| <b>≤0.001</b>   | 5055          | 1.25   | 1.25     | 0.782  | 0.782             | 2.991  | 2.990    | 1127   | 1.27   |
| <b>≤0.01</b>    | 26528         | 1.18   | 1.18     | 0.778  | 0.778             | 2.493  | 2.490    | 6034   | 1.22   |
| <b>≤0.05</b>    | 98717         | 1.18   | 1.18     | 0.778  | 0.778             | 2.268  | 2.265    | 21876  | 1.20   |
| <b>≤0.1</b>     | 180576        | 1.17   | 1.17     | 0.778  | 0.778             | 2.381  | 2.378    | 39117  | 1.19   |
| <b>≤0.2</b>     | 334259        | 1.15   | 1.16     | 0.777  | 0.777             | 2.349  | 2.343    | 70397  | 1.19   |
| <b>≤0.5</b>     | 772780        | 1.14   | 1.14     | 0.776  | 0.776             | 2.409  | 2.403    | 152567 | 1.19   |

| LD=0.8   |        |          |                   |          | LD=0.5 |        |          |        |          |
|----------|--------|----------|-------------------|----------|--------|--------|----------|--------|----------|
| RR       | AUC    |          | Calibration Score |          |        | RR     |          | AUC    |          |
| Genotype | Dosage | Genotype | Dosage            | Genotype | N      | Dosage | Genotype | Dosage | Genotype |
| 1.20     | 0.779  | 0.779    | 2.518             | 2.461    | 21     | 1.20   | 1.20     | 0.779  | 0.779    |
| 1.25     | 0.780  | 0.781    | 2.297             | 2.231    | 120    | 1.22   | 1.22     | 0.779  | 0.779    |
| 1.27     | 0.782  | 0.782    | 2.278             | 2.350    | 1711   | 1.23   | 1.23     | 0.780  | 0.780    |
| 1.22     | 0.779  | 0.779    | 2.440             | 2.423    | 9935   | 1.19   | 1.18     | 0.778  | 0.778    |
| 1.21     | 0.779  | 0.779    | 2.732             | 2.657    | 36552  | 1.20   | 1.20     | 0.778  | 0.778    |
| 1.20     | 0.779  | 0.779    | 2.881             | 2.833    | 65140  | 1.20   | 1.19     | 0.778  | 0.778    |
| 1.20     | 0.778  | 0.778    | 2.886             | 2.853    | 115731 | 1.19   | 1.18     | 0.778  | 0.778    |
| 1.19     | 0.778  | 0.778    | 2.846             | 2.823    | 242212 | 1.20   | 1.19     | 0.778  | 0.778    |

| LD=0.8   |        |          |                   |          | LD=0.5 |        |          |        |          |
|----------|--------|----------|-------------------|----------|--------|--------|----------|--------|----------|
| RR       | AUC    |          | Calibration Score |          |        | RR     |          | AUC    |          |
| Genotype | Dosage | Genotype | Dosage            | Genotype | N      | Dosage | Genotype | Dosage | Genotype |
| 1.19     | 0.778  | 0.778    | 2.545             | 2.536    | 19     | 1.19   | 1.19     | 0.778  | 0.778    |
| 1.24     | 0.779  | 0.781    | 2.648             | 2.258    | 108    | 1.16   | 1.22     | 0.777  | 0.779    |
| 1.26     | 0.777  | 0.781    | 2.623             | 2.447    | 1585   | 1.11   | 1.22     | 0.775  | 0.780    |
| 1.21     | 0.778  | 0.779    | 2.661             | 2.506    | 9120   | 1.13   | 1.17     | 0.776  | 0.778    |
| 1.21     | 0.777  | 0.779    | 2.814             | 2.674    | 33189  | 1.13   | 1.19     | 0.776  | 0.778    |
| 1.19     | 0.777  | 0.778    | 2.830             | 2.847    | 58917  | 1.14   | 1.18     | 0.776  | 0.778    |
| 1.19     | 0.777  | 0.778    | 2.841             | 2.853    | 104040 | 1.14   | 1.18     | 0.776  | 0.777    |
| 1.19     | 0.778  | 0.778    | 2.874             | 2.826    | 215602 | 1.15   | 1.19     | 0.776  | 0.778    |

| LD=0.8   |        |          |                   |          | LD=0.5 |        |          |        |          |
|----------|--------|----------|-------------------|----------|--------|--------|----------|--------|----------|
| RR       | AUC    |          | Calibration Score |          |        | RR     |          | AUC    |          |
| Genotype | Dosage | Genotype | Dosage            | Genotype | N      | Dosage | Genotype | Dosage | Genotype |
| 1.19     | 0.778  | 0.778    | 2.545             | 2.536    | 19     | 1.19   | 1.19     | 0.778  | 0.778    |
| 1.24     | 0.779  | 0.781    | 2.763             | 2.263    | 95     | 1.17   | 1.24     | 0.777  | 0.780    |
| 1.26     | 0.779  | 0.782    | 2.806             | 2.449    | 1448   | 1.17   | 1.22     | 0.777  | 0.780    |
| 1.21     | 0.778  | 0.779    | 2.684             | 2.496    | 8184   | 1.15   | 1.17     | 0.776  | 0.778    |
| 1.21     | 0.778  | 0.779    | 2.886             | 2.677    | 29623  | 1.15   | 1.19     | 0.776  | 0.778    |
| 1.10     | 0.778  | 0.774    | 2.886             | 2.687    | 52116  | 1.15   | 1.18     | 0.777  | 0.778    |
| 1.18     | 0.777  | 0.778    | 2.851             | 2.884    | 91413  | 1.14   | 1.16     | 0.776  | 0.776    |
| 1.19     | 0.777  | 0.778    | 2.896             | 2.863    | 187319 | 1.13   | 1.19     | 0.776  | 0.778    |

| LD=0.8   |        |          |                   |          | LD=0.5 |        |          |        |          |
|----------|--------|----------|-------------------|----------|--------|--------|----------|--------|----------|
| RR       | AUC    |          | Calibration Score |          |        | RR     |          | AUC    |          |
| Genotype | Dosage | Genotype | Dosage            | Genotype | N      | Dosage | Genotype | Dosage | Genotype |
| 1.18     | 0.777  | 0.777    | 2.653             | 2.778    | 14     | 1.14   | 1.14     | 0.776  | 0.776    |

|      |       |       |       |       |        |      |      |       |       |
|------|-------|-------|-------|-------|--------|------|------|-------|-------|
| 1.24 | 0.781 | 0.781 | 2.302 | 2.365 | 75     | 1.25 | 1.23 | 0.781 | 0.780 |
| 1.26 | 0.781 | 0.782 | 2.410 | 2.335 | 1074   | 1.22 | 1.20 | 0.779 | 0.779 |
| 1.21 | 0.779 | 0.779 | 2.350 | 2.348 | 5770   | 1.17 | 1.17 | 0.777 | 0.778 |
| 1.20 | 0.779 | 0.779 | 2.686 | 2.685 | 20395  | 1.20 | 1.19 | 0.778 | 0.778 |
| 1.18 | 0.778 | 0.779 | 2.877 | 2.877 | 35474  | 1.19 | 1.18 | 0.778 | 0.778 |
| 1.19 | 0.778 | 0.778 | 2.878 | 2.854 | 61564  | 1.19 | 1.19 | 0.778 | 0.778 |
| 1.19 | 0.778 | 0.778 | 2.845 | 2.818 | 123301 | 1.20 | 1.19 | 0.778 | 0.778 |

| LD=0.8   |        |          |                   |          | LD=0.5 |        |          |        |          |       |
|----------|--------|----------|-------------------|----------|--------|--------|----------|--------|----------|-------|
| RR       | AUC    |          | Calibration Score |          | N      | RR     | AUC      |        |          |       |
| Genotype | Dosage | Genotype | Dosage            | Genotype |        | Dosage | Genotype | Dosage | Genotype |       |
|          | 1.17   | 0.777    | 0.777             | 2.651    | 2.684  | 13     | 1.14     | 1.13   | 0.775    | 0.775 |
|          | 1.24   | 0.781    | 0.781             | 2.317    | 2.422  | 61     | 1.27     | 1.22   | 0.782    | 0.780 |
|          | 1.27   | 0.782    | 0.782             | 2.585    | 2.523  | 816    | 1.24     | 1.21   | 0.780    | 0.779 |
|          | 1.22   | 0.780    | 0.780             | 2.360    | 2.312  | 4256   | 1.18     | 1.18   | 0.778    | 0.778 |
|          | 1.19   | 0.779    | 0.779             | 2.653    | 2.603  | 14920  | 1.20     | 1.19   | 0.779    | 0.778 |
|          | 1.18   | 0.779    | 0.778             | 2.855    | 2.867  | 25888  | 1.20     | 1.17   | 0.779    | 0.778 |
|          | 1.19   | 0.779    | 0.779             | 2.903    | 2.885  | 44829  | 1.21     | 1.19   | 0.779    | 0.778 |
|          | 1.18   | 0.778    | 0.778             | 2.903    | 2.923  | 89178  | 1.20     | 1.19   | 0.778    | 0.778 |

|                   |          | LD=0.2 |        |          |        |          |                   |          |  |
|-------------------|----------|--------|--------|----------|--------|----------|-------------------|----------|--|
| Calibration Score |          | RR     |        |          | AUC    |          | Calibration Score |          |  |
| Dosage            | Genotype | N      | Dosage | Genotype | Dosage | Genotype | Dosage            | Genotype |  |
| 2.510             | 2.427    | 18     | 1.19   | 1.20     | 0.780  | 0.780    | 2.514             | 2.356    |  |
| 2.524             | 2.498    | 95     | 1.18   | 1.19     | 0.777  | 0.777    | 2.586             | 2.595    |  |
| 2.235             | 2.340    | 1406   | 1.18   | 1.17     | 0.777  | 0.777    | 2.248             | 2.377    |  |
| 2.606             | 2.583    | 7824   | 1.16   | 1.16     | 0.776  | 0.777    | 2.721             | 2.728    |  |
| 2.757             | 2.724    | 26454  | 1.17   | 1.17     | 0.777  | 0.777    | 2.746             | 2.743    |  |
| 2.892             | 2.849    | 45001  | 1.18   | 1.17     | 0.778  | 0.778    | 2.847             | 2.774    |  |
| 2.790             | 2.790    | 74889  | 1.20   | 1.20     | 0.778  | 0.778    | 2.839             | 2.788    |  |
| 2.726             | 2.707    | 137544 | 1.21   | 1.20     | 0.778  | 0.778    | 2.739             | 2.667    |  |

|                   |          | LD=0.2 |        |          |        |          |                   |          |  |
|-------------------|----------|--------|--------|----------|--------|----------|-------------------|----------|--|
| Calibration Score |          | RR     |        |          | AUC    |          | Calibration Score |          |  |
| Dosage            | Genotype | N      | Dosage | Genotype | Dosage | Genotype | Dosage            | Genotype |  |
| 2.551             | 2.526    | 16     | 1.18   | 1.19     | 0.778  | 0.778    | 2.570             | 2.481    |  |
| 2.950             | 2.497    | 85     | 1.13   | 1.19     | 0.776  | 0.777    | 2.969             | 2.614    |  |
| 2.727             | 2.440    | 1291   | 1.08   | 1.17     | 0.775  | 0.777    | 2.762             | 2.459    |  |
| 2.831             | 2.676    | 7091   | 1.11   | 1.15     | 0.775  | 0.776    | 2.917             | 2.814    |  |
| 2.958             | 2.746    | 23592  | 1.10   | 1.17     | 0.775  | 0.777    | 3.028             | 2.755    |  |
| 2.882             | 2.858    | 39828  | 1.11   | 1.17     | 0.775  | 0.777    | 2.935             | 2.802    |  |
| 2.831             | 2.783    | 65458  | 1.12   | 1.19     | 0.776  | 0.778    | 2.915             | 2.767    |  |
| 2.856             | 2.718    | 117127 | 1.13   | 1.20     | 0.776  | 0.777    | 2.930             | 2.666    |  |

|                   |          | LD=0.2 |        |          |        |          |                   |          |  |
|-------------------|----------|--------|--------|----------|--------|----------|-------------------|----------|--|
| Calibration Score |          | RR     |        |          | AUC    |          | Calibration Score |          |  |
| Dosage            | Genotype | N      | Dosage | Genotype | Dosage | Genotype | Dosage            | Genotype |  |
| 2.551             | 2.526    | 16     | 1.18   | 1.19     | 0.778  | 0.778    | 2.570             | 2.481    |  |
| 3.006             | 2.466    | 77     | 1.15   | 1.21     | 0.776  | 0.778    | 2.956             | 2.550    |  |
| 2.873             | 2.404    | 1169   | 1.14   | 1.16     | 0.776  | 0.777    | 2.903             | 2.451    |  |
| 2.827             | 2.693    | 6303   | 1.13   | 1.14     | 0.776  | 0.776    | 2.915             | 2.840    |  |
| 3.007             | 2.757    | 20771  | 1.13   | 1.17     | 0.775  | 0.777    | 3.055             | 2.828    |  |
| 2.909             | 2.931    | 34660  | 1.13   | 1.17     | 0.776  | 0.777    | 2.922             | 2.917    |  |
| 2.795             | 2.883    | 56293  | 1.13   | 1.19     | 0.775  | 0.778    | 2.820             | 2.837    |  |
| 2.858             | 2.779    | 98725  | 1.12   | 1.21     | 0.775  | 0.778    | 2.869             | 2.760    |  |

|                   |          | LD=0.2 |        |          |        |          |                   |          |  |
|-------------------|----------|--------|--------|----------|--------|----------|-------------------|----------|--|
| Calibration Score |          | RR     |        |          | AUC    |          | Calibration Score |          |  |
| Dosage            | Genotype | N      | Dosage | Genotype | Dosage | Genotype | Dosage            | Genotype |  |
| 2.867             | 2.975    | 12     | 1.09   | 1.09     | 0.774  | 0.774    | 2.937             | 2.967    |  |

|       |       |       |      |      |       |       |       |       |
|-------|-------|-------|------|------|-------|-------|-------|-------|
| 2.521 | 2.665 | 60    | 1.23 | 1.18 | 0.779 | 0.777 | 2.609 | 2.731 |
| 2.213 | 2.259 | 855   | 1.17 | 1.14 | 0.777 | 0.776 | 2.181 | 2.288 |
| 2.578 | 2.517 | 4356  | 1.14 | 1.13 | 0.776 | 0.776 | 2.694 | 2.648 |
| 2.819 | 2.730 | 13932 | 1.19 | 1.18 | 0.778 | 0.778 | 2.815 | 2.783 |
| 2.975 | 2.896 | 22908 | 1.19 | 1.18 | 0.778 | 0.778 | 3.023 | 2.975 |
| 2.843 | 2.756 | 36680 | 1.21 | 1.20 | 0.779 | 0.779 | 2.934 | 2.916 |
| 2.779 | 2.710 | 62442 | 1.22 | 1.21 | 0.779 | 0.778 | 2.848 | 2.885 |

| Calibration Score |          | LD=0.2 |        |          |        |          |        | Calibration Score |  |
|-------------------|----------|--------|--------|----------|--------|----------|--------|-------------------|--|
| Dosage            | Genotype | N      | RR     |          | AUC    |          | Dosage | Genotype          |  |
|                   |          |        | Dosage | Genotype | Dosage | Genotype |        |                   |  |
| 2.853             | 2.892    | 11     | 1.08   | 1.12     | 0.774  | 0.774    | 2.928  | 2.937             |  |
| 2.486             | 2.804    | 48     | 1.25   | 1.19     | 0.781  | 0.778    | 2.743  | 2.891             |  |
| 2.318             | 2.450    | 645    | 1.19   | 1.15     | 0.778  | 0.776    | 2.220  | 2.403             |  |
| 2.577             | 2.459    | 3193   | 1.15   | 1.15     | 0.777  | 0.777    | 2.626  | 2.517             |  |
| 2.814             | 2.622    | 10152  | 1.18   | 1.17     | 0.778  | 0.778    | 2.876  | 2.691             |  |
| 2.959             | 2.885    | 16626  | 1.19   | 1.16     | 0.778  | 0.778    | 3.006  | 2.925             |  |
| 2.897             | 2.814    | 26596  | 1.20   | 1.20     | 0.779  | 0.779    | 2.966  | 2.936             |  |
| 2.877             | 2.845    | 45069  | 1.19   | 1.20     | 0.778  | 0.778    | 3.000  | 3.004             |  |
